# Supplementary material
Source: PubMed Central journal article supplement (PMC3107903)
Supplement: NIHMS275211-supplement-01.pdf [file NIHMS275211-supplement-01.pdf]

**Supplementary Table 1: Specific reagents and notes**

| <b>Name of the reagent</b>                     | <b>Company</b>                                  | <b>Catalogue number</b> | <b>Notes</b>                                                                      |
|------------------------------------------------|-------------------------------------------------|-------------------------|-----------------------------------------------------------------------------------|
| QIAquick Gel Extraction Kit                    | QIAGEN                                          | 28706                   | DNA purification                                                                  |
| Bio-spin 30 column                             | Bio-Rad                                         | 732-6250                | RNA purification                                                                  |
| Taq PCR DNA polymerase                         | Sigma-Aldrich                                   | D1806                   | DNA synthesis                                                                     |
| DuraScribe T7 transcription Kit                | EpiCentre                                       | DS010925                | RNA synthesis                                                                     |
| dNTP for PCR                                   | Roche                                           | 1 581 295               | DNA synthesis                                                                     |
| HIV-1 <sub>Ba-L</sub> gp120 protein            | the AIDS Research and Reference Reagent Program | 4961                    | Target protein                                                                    |
| Silencer siRNA labeling kit - Cy3              | Ambion                                          | 1632                    | Light sensitive                                                                   |
| Acid phenol / chloroform 5/1 solution (pH 4.5) | Ambion                                          | AM9720                  | Human health hazards. Take appropriate measures to prevent exposure               |
| Chloroform/Isopropano 1 24/1 solution          | Sigma                                           | C0549                   |                                                                                   |
| Calf intestinal phosphatase (CIP)              | New England BioLab                              | M0290L                  | Remove 5' - triphosphates                                                         |
| T4 polynucleotide kinase                       | New England BioLab                              | M0201L                  | P <sup>32</sup> -ATP labeling                                                     |
| Glycogen                                       | Roche                                           | 10 901 393 001          | RNA precipitation                                                                 |
| Gamma-P <sup>32</sup> -ATP                     | MP Biomedical                                   | 013502002               | Radiactivity                                                                      |
| 40% AccuGel 19:1                               | National Diagnostics                            | EC-850                  | Neurotoxin. Take appropriate measures to prevent exposure.                        |
| 10×TBE                                         | National Diagnostics                            | EC-860                  | Gel running                                                                       |
| N,N,N,N'-Tetramethylethylenediamine (TMEMD)    | Sigma-Aldrich                                   | T9281                   | Catalyst of Gel polymerization                                                    |
| Ammonium persulfate (APS)                      | Sigma-Aldrich                                   | A3678                   | Prepare 10% water solution and freeze immediately in single use aliquots at -20°C |
| Dynabeads CD8                                  | Invitrogen                                      | 111-47D                 | CD8 cells depletion                                                               |
| L-methioine sulfoximine                        | Sigma-Aldrich                                   | M5379-250 mg            | CHO cells culture                                                                 |
| RPMI Media 1640                                | Invitrogen                                      | 11835-030               | Cell culture                                                                      |
| Sodium Bicarbonate solution, 7.5% w/v          | Invitrogen                                      | 25080-094               | CHO cells culture                                                                 |
| Minimum Essential                              | Invitrogen                                      | 11430-030               | CHO cells culture                                                                 |

|                                      |              |              |                       |
|--------------------------------------|--------------|--------------|-----------------------|
| Medium (MEM) (10×)                   |              |              |                       |
| MEM non-essential amino acid (100×)  | Invitrogen   | 11140-050    | CHO cells culture     |
| Alliance HIV-1 p24 Antigen ELISA kit | Perkin Elmer | NEK050A001KT | HIV-1 challenge assay |
